# Supplementary material for: Human selenoprotein P and S variant mRNAs with different numbers of SECIS elements and inferences from mutant mice of the roles of multiple SECIS elements
Source: PubMed Central journal article supplement (PMC5133445; doi:10.1098/rsob.160241), 2016-11-23

# Supplementary Material S2

## Expression analysis of SelS

### **Legends:**

#### Figure S2A:

Schema of SelS gene structure (gene name: VIMP), including the exons and junctions that were quantified in GTEx. The exons and junctions that do not belong to the canonical, most abundant isoform are highlighted.

#### Figure S2B:

SelS exon quantification in GTEx samples, split by subtissue. Non-canonical exons are highlighted. The dotted red lines represent an arbitrary detection limit, an expression threshold of 0.1 RPKM.

#### Figure S2C:

SelS exon junction quantification in GTEx samples, split by subtissue. Non-canonical exons are highlighted. The dotted red lines represent an arbitrary detection limit, an expression threshold of 0.1 RPKM.

33

Figure S2A:

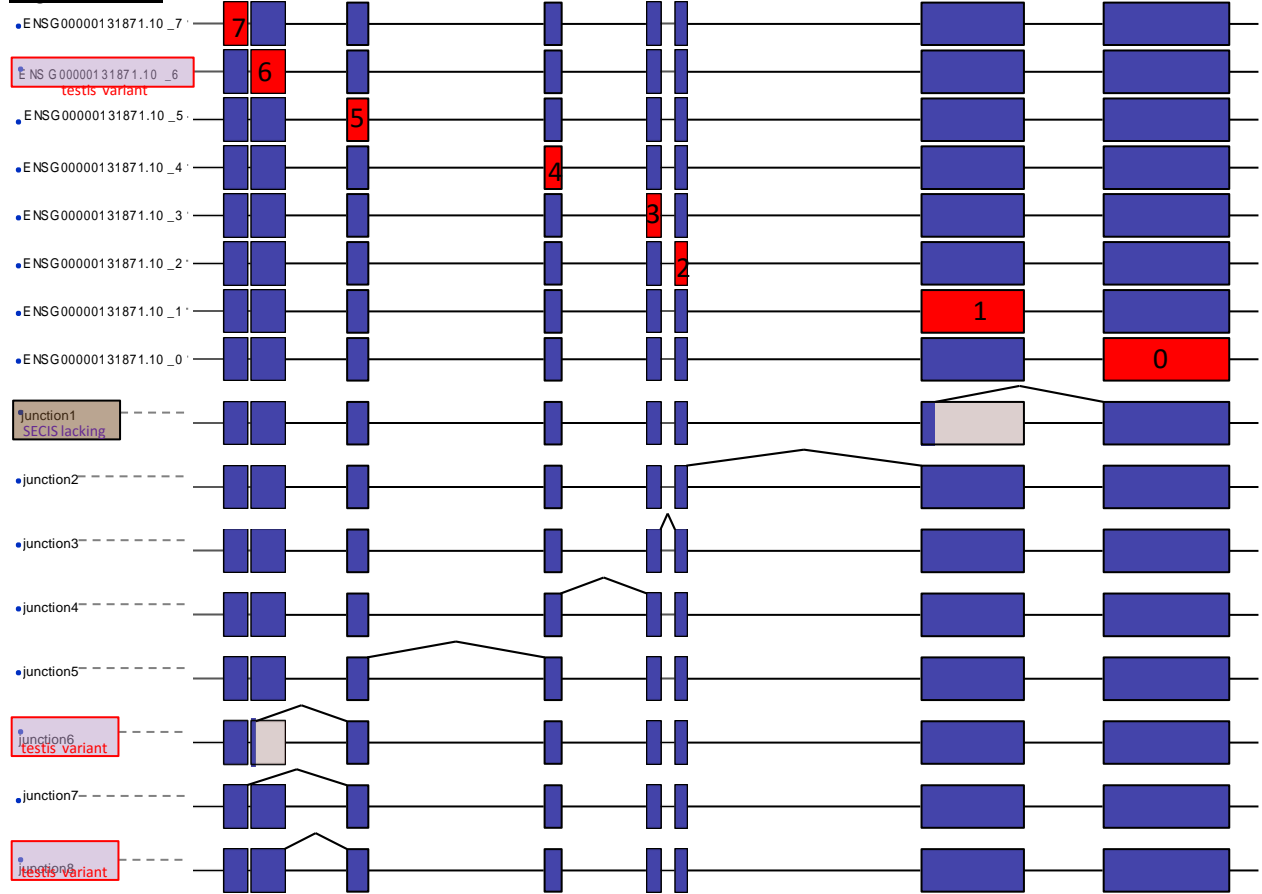

34

Figure S2B

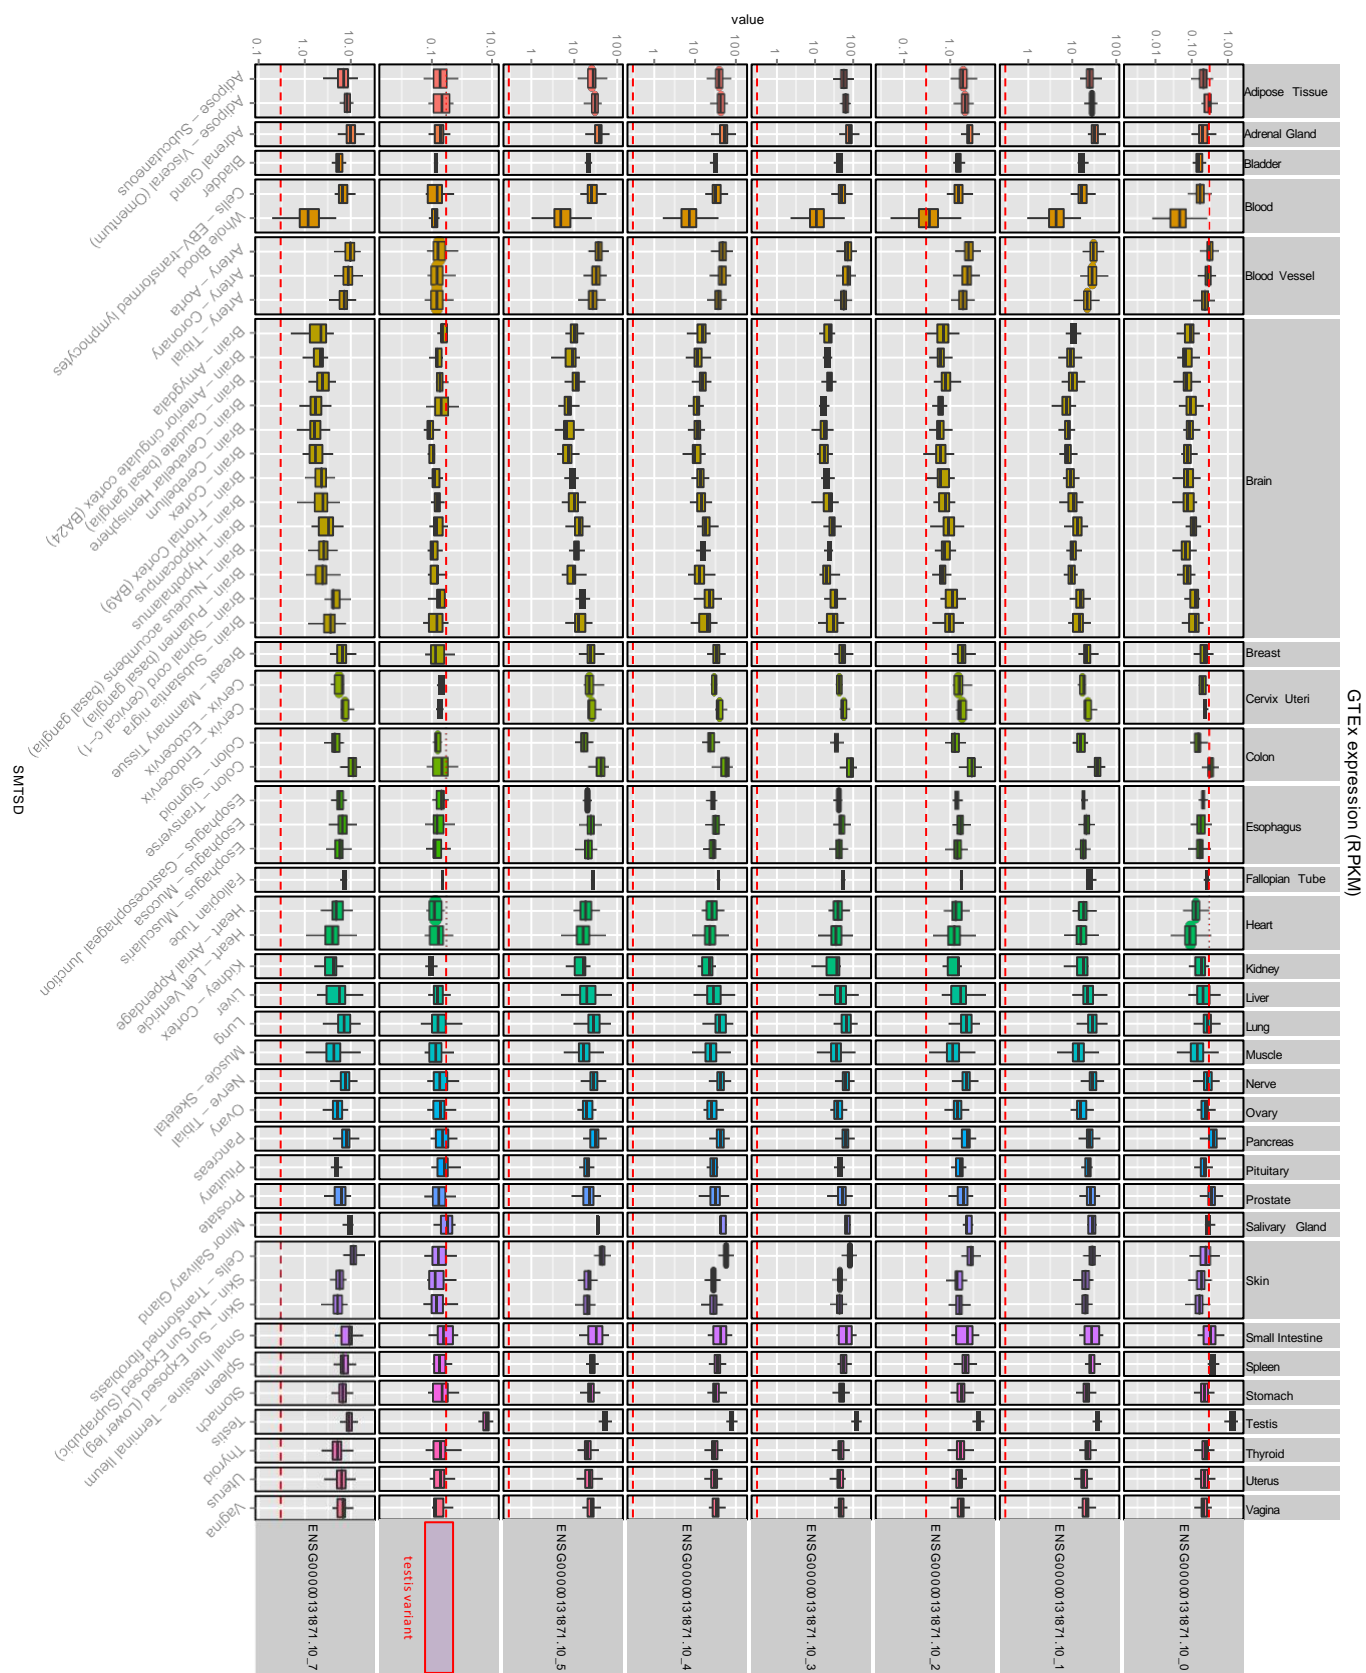

Figure S2C

GTEx expression (junction\_reads / hb\_size)

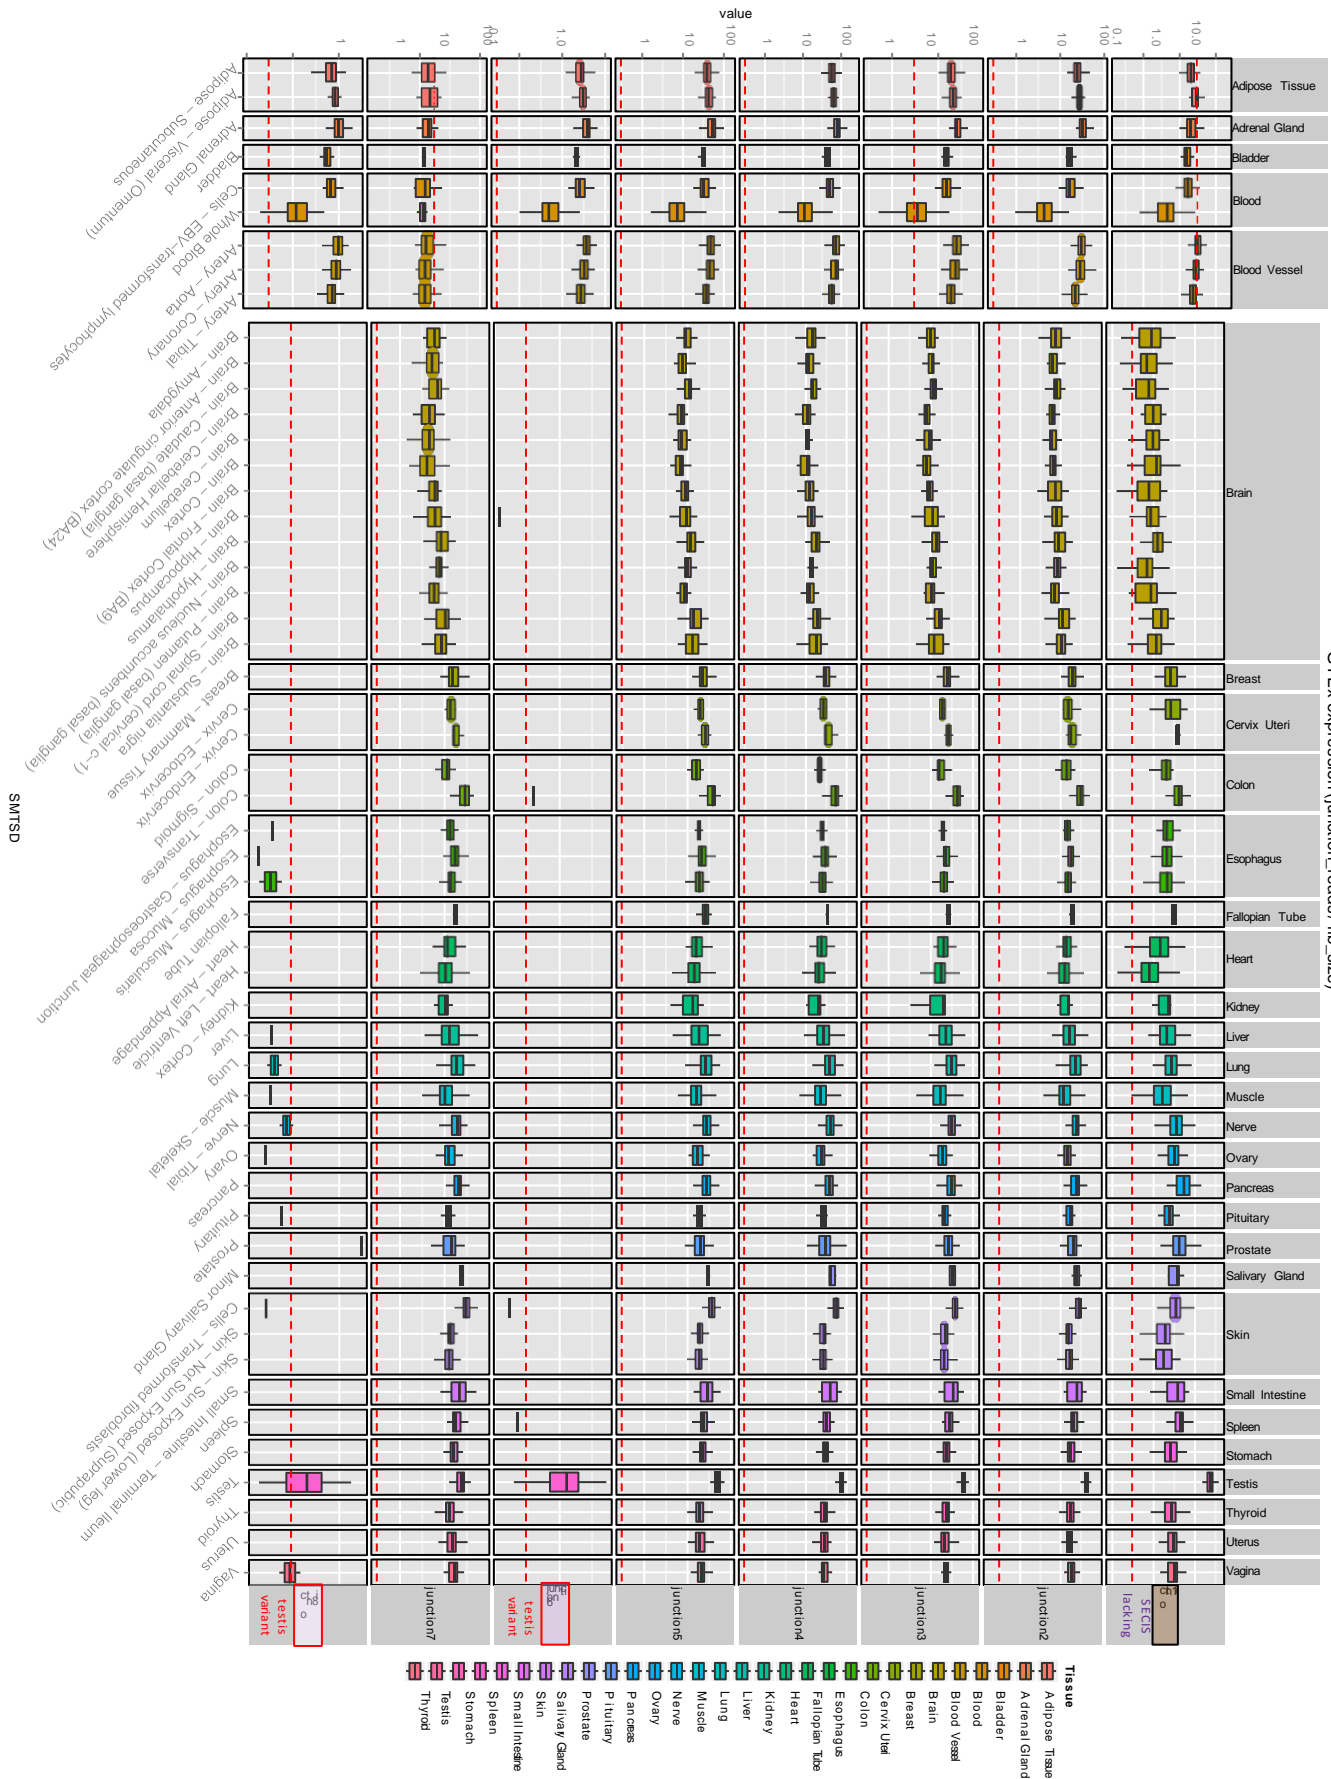

Supplement: rsob160241supp2.pdf [file rsob160241supp2.pdf]
