# Supplementary material for: Human selenoprotein P and S variant mRNAs with different numbers of SECIS elements and inferences from mutant mice of the roles of multiple SECIS elements
Source: PubMed Central journal article supplement (PMC5133445; doi:10.1098/rsob.160241), 2016-11-23

# Supplementary Material S3

## Analysis of SECIS elements in Sepp1 genes

### **Legends:**

#### Figure S3A

Alignment of SECIS elements in selenoprotein P genes of representative vertebrate species. SelPa is used to designate the direct homologue of human Sepp1, with multiple in-frame UGAs, while SelPb designates the additional single-UGA containing gene found in non placental vertebrates (Sepp1b). S1 designates the first SECIS found downstream of the coding sequence. S2 designates the second one e.g. SelPa.S1.Alligator\_mississippiensis is the first sequence in the multi-Sec Sepp1 of the alligator. The consensus sequence is displayed at the bottom.

#### Figure S3B

Average distance tree computed by Jalview based on the alignment shown in panel

#### Figure S3C

Structure of SECIS elements as predicted by SECISearch3 webserver

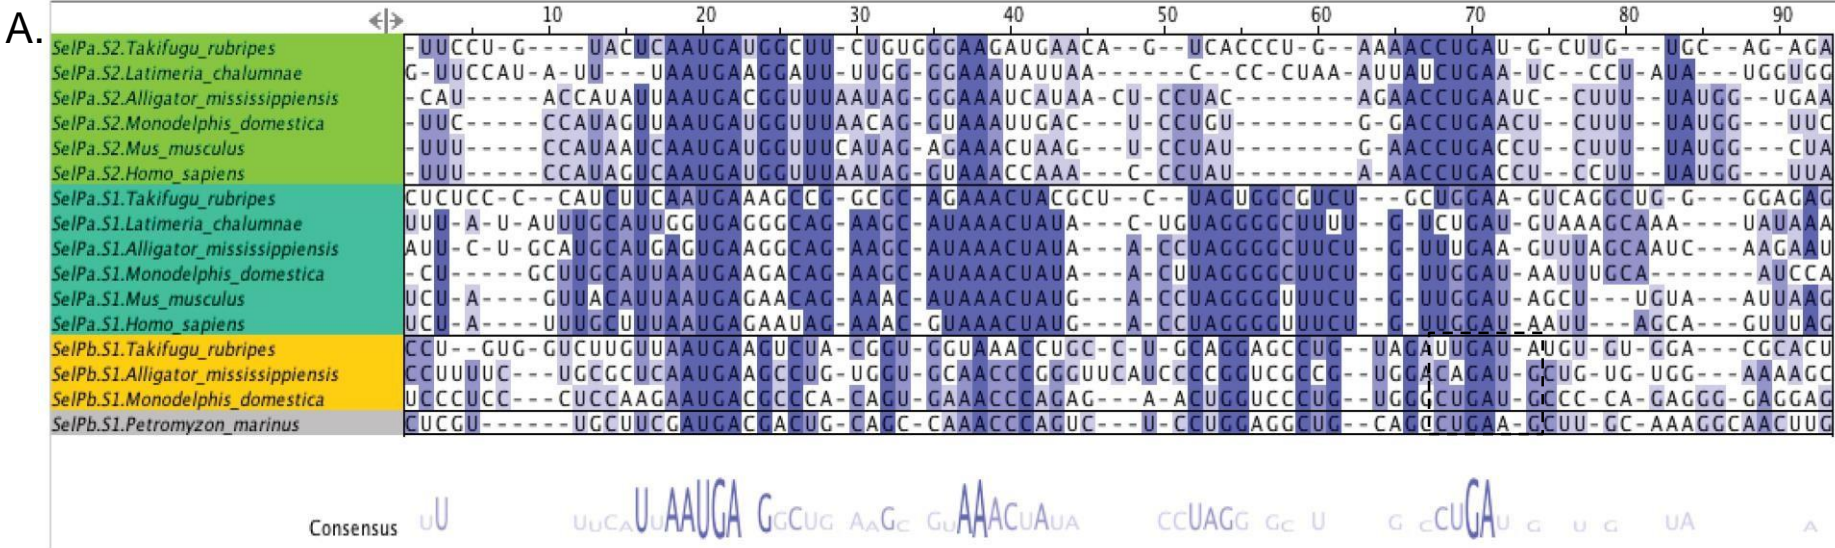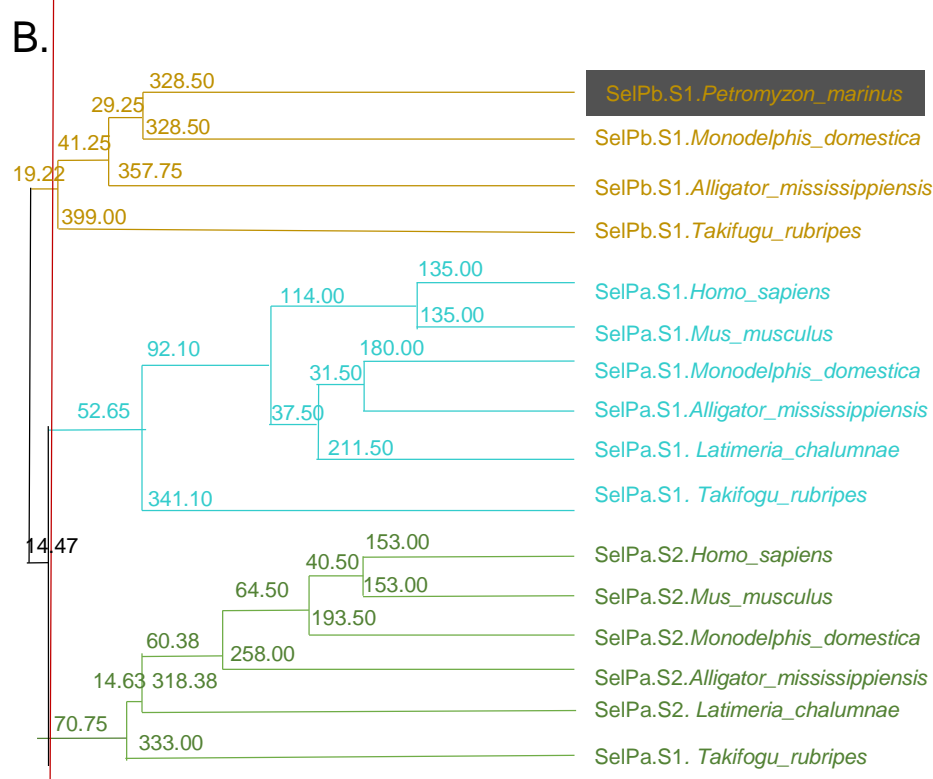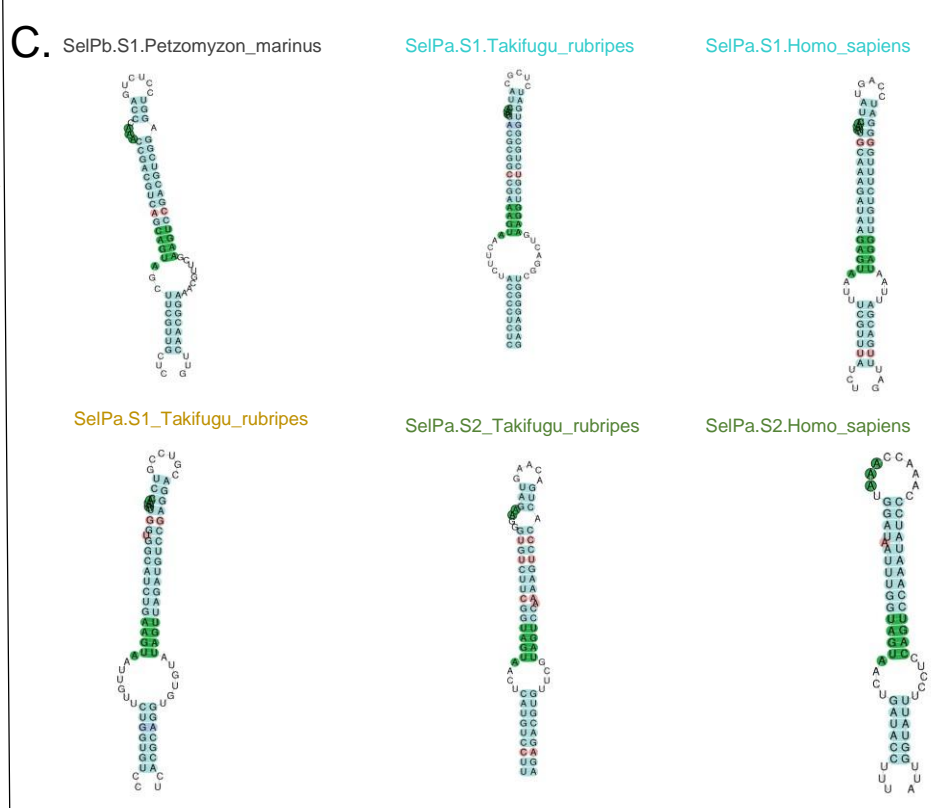

Supplement: rsob160241supp3.pdf [file rsob160241supp3.pdf]
